# Supplementary material for: Planning Capacity for Mental Health and Addiction Services in the Emergency Department: A Discrete-Event Simulation Approach
Source: Hindawi journal article supplement (doi:10.1155/2019/8973515), 2019-06-02
Supplement: f1 [file 8973515.f1.pdf]

# JOURNAL OF HEALTHCARE ENGINEERING

## Supplementary Material

Additional metrics obtained from each simulated scenario are provided in supplementary material (Appendix A, Tables 5-10).

### Appendix A: List of results for simulated scenarios

Table 5: Simulation results for Scenario A - Simulating forecasted demand for years 2017 and 2018

| Metric                     | Base run 2016<br>(Avg. and 95% CI) | Forecasted 2017<br>(Avg. and 95% CI) | Forecasted 2018<br>(Avg. and 95% CI) |
|----------------------------|------------------------------------|--------------------------------------|--------------------------------------|
| NMHA number of arrivals    | 58,939.3<br>(58,819.1 - 59,059.5)  | 61,960.7<br>(61,836.5 - 62,085.0)    | 63,799.2<br>(63,677.3 - 63,921.0)    |
| Average NMHA ED LOS (h)    | 6.1<br>(5.8 - 6.3)                 | 9.2<br>(8.4 - 9.8)                   | 17.4<br>(14.9 - 19.9)                |
| MHA number of arrivals     | 6,141.2<br>(6,108.5 - 6,174.0)     | 6,298.7<br>(6,266.4 - 6,1331)        | 6,749.8<br>(6,714.9 - 6,784.72)      |
| Average MHA ED LOS (h)     | 7.7<br>(7.6 - 7.8)                 | 7.7<br>(7.6 - 7.8)                   | 7.7<br>(7.6 - 7.7)                   |
| Average overall ED LOS (h) | 6.2<br>(5.9 - 6.4)                 | 9.0<br>(8.3 - 9.7)                   | 16.7<br>(14.4 - 19.1)                |
| # patients seen in PESU    | 2,326.7<br>(2,320.1 - 2,333.20)    | 2,338.9<br>(2,331 - 2346.6)          | 2,365.6<br>(2,356.6 - 2,374.6)       |
| ER occupancy (%)           | 88.8                               | 93.3                                 | 95.2                                 |
| PESU occupancy (%)         | 91.6                               | 92.4                                 | 93.2                                 |

## JOURNAL OF HEALTHCARE ENGINEERING

Table 6: Simulation results for Scenario B - Decrease in the number substance abuse visits (Alcohol and opioid visits related only)

| <b>Metric</b>                 | <b>Base run 2017<br/>(95% CI)</b> | <b>-10%<br/>(95% CI)</b>       | <b>-30%<br/>(95% CI)</b>       | <b>-45%<br/>(95% CI)</b>       | <b>-63%<br/>(95% CI)</b>       |
|-------------------------------|-----------------------------------|--------------------------------|--------------------------------|--------------------------------|--------------------------------|
| Average NMHA<br>ED LOS (h)    | 6.1<br>(5.8 - 6.3)                | 6.0<br>(5.7 – 6.4)             | 5.6<br>(5.4 – 5.8)             | 5.5<br>(5.2 – 5.7)             | 5.2<br>(5.0 – 5.4)             |
| Substance abuse<br>Arrivals   | 2,886.8<br>(2,865.1 - 2,908.4)    | 2,667.8<br>(2,647.2 – 2,688.4) | 2,220.6<br>(2,200.6 – 2,240.6) | 1,877.5<br>(1,861.4 – 1,893.6) | 1,501.5<br>(1485.2 – 1,517.7)  |
| MHA number of<br>arrivals     | 6,141.2<br>(6,108.5 - 6,174.0)    | 5,922.3<br>(5,889.1 – 5,955.4) | 5,475.1<br>(5,443.0 – 5,507.1) | 5,132.0<br>(5,103.7 – 5,160.2) | 4,755.9<br>(4,729.4 – 4,782.4) |
| Average MHA<br>ED LOS (h)     | 7.7<br>(7.6 - 7.8)                | 7.8<br>(7.7 – 7.8)             | 7.9<br>(7.8 – 8.1)             | 8.2<br>(8.1 – 8.3)             | 8.2<br>(8.0 – 8.3)             |
| Average overall<br>ED LOS (h) | 6.2<br>(5.9 - 6.4)                | 6.1<br>(5.8 – 6.4)             | 5.7<br>(5.5 – 5.9)             | 5.6<br>(5.4 – 5.8)             | 5.3<br>(5.2 – 5.5)             |
| # patients seen<br>in PESU    | 2,326.7<br>(2,320.1 - 2,333.2)    | 2,312.9<br>(2,307.0 – 2,318.7) | 2,287.5<br>(2,280.5 – 2,294.5) | 2,266.9<br>(2,259.8 – 2,274.0) | 2,240.8<br>(2,234.0 – 2,247.5) |
| ER occupancy<br>(%)           | 88.8                              | 87.3                           | 86.5                           | 87.4                           | 86.6                           |
| PESU<br>occupancy (%)         | 91.6                              | 90.8                           | 89.8                           | 89.4                           | 88.0                           |

## JOURNAL OF HEALTHCARE ENGINEERING

Table 7: Simulation results for Scenario C – Increase and decrease in the number substance abuse (Increase and decrease in the number of cannabis related visits only)

| Metric                        | Base run 2017<br>(95% CI)      | +19%<br>(95% CI)               | -27%<br>(95% CI)               |
|-------------------------------|--------------------------------|--------------------------------|--------------------------------|
| Average NMHA<br>ED LOS (h)    | 6.1<br>(5.8 - 6.3)             | 6.2<br>(6.0 – 6.5)             | 6.0<br>(5.7 – 6.4)             |
| Substance abuse<br>Arrivals   | 2,886.8<br>(2,865.1 - 2,908.4) | 2,906.1<br>(2,884.4 – 2,927.7) | 2,896.0<br>(2,874.6 – 2,917.3) |
| MHA number of<br>arrivals     | 6,141.2<br>(6,108.5 - 6,174.0) | 6,160.5<br>(6,127.7 – 6,193.3) | 6,150.4<br>(6,117.8 – 6,183.0) |
| Average MHA<br>ED LOS (h)     | 7.7<br>(7.6 - 7.8)             | 7.7<br>(7.6 – 7.9)             | 7.8<br>(7.7 – 7.8)             |
| Average overall<br>ED LOS (h) | 6.2<br>(5.9 - 6.4)             | 6.3<br>(6.1 – 6.6)             | 6.1<br>(5.8 – 6.4)             |
| # patients seen<br>in PESU    | 2,326.7<br>(2,320.1 - 2,333.2) | 2,326.9<br>(2,320.1 – 2,333.7) | 2,328.2<br>(2,320.9 – 2,335.4) |
| ER occupancy<br>(%)           | 88.8                           | 89.4                           | 89.1                           |
| PESU<br>occupancy (%)         | 91.6                           | 91.4                           | 91.6                           |

## JOURNAL OF HEALTHCARE ENGINEERING

Table 8: Simulation results for Scenario D - Change in capacity - number of PESU BEDS

| Metric                        | <b>Base run 2016<br/>(6 beds)<br/>(95% CI)</b> | <b>2016 (7 beds)<br/>(95% CI)</b> | <b>2016 (8 beds)<br/>(95% CI)</b> | <b>2016 (9 beds)<br/>(95% CI)</b> | <b>2016 (10 beds)<br/>(95% CI)</b> |
|-------------------------------|------------------------------------------------|-----------------------------------|-----------------------------------|-----------------------------------|------------------------------------|
| Average NMHA ED<br>LOS (h)    | 6.1<br>(5.8 - 6.3)                             | 5.7<br>(5.5 - 6.0)                | 5.5<br>(5.3 - 5.7)                | 5.3<br>(5.1 - 5.5)                | 5.1<br>(4.9 - 5.2)                 |
| Average MHA ED<br>LOS (h)     | 7.7<br>(7.6 - 7.8)                             | 7.7<br>(7.6 - 7.8)                | 7.7<br>(7.6 - 7.8)                | 7.7<br>(7.6 - 7.8)                | 7.8<br>(7.7 - 7.9)                 |
| Average overall ED<br>LOS (h) | 6.2<br>(5.9 - 6.4)                             | 5.8<br>(5.6 - 6.1)                | 5.6<br>(5.4 - 5.8)                | 5.4<br>(5.2 - 5.6)                | 5.2<br>(5.0 - 5.3)                 |
| # patients seen in<br>PESU    | 2,326.7<br>(2,320.1 - 2,333.20)                | 2,692.3<br>(2,685.0 - 2,699.5)    | 3,040.4<br>(3,032.9 - 3,047.9)    | 3,382.5<br>(3,373.5 - 3,391.5)    | 3,710.5<br>(3,698.2 - 3,722.8)     |
| ER occupancy (%)              | 88.8                                           | 87.7                              | 86.8                              | 86.2                              | 85.4                               |
| PESU occupancy<br>(%)         | 91.6                                           | 90.5                              | 89.9                              | 88.2                              | 87.7                               |

## JOURNAL OF HEALTHCARE ENGINEERING

Table 9: Simulation results for Scenario E Part 1- Combined change in demand and PESU bed capacity (2017)

| <b>Metric</b>                 | <b>2017 (6 beds)<br/>(95% CI)</b> | <b>2017 (7 beds)<br/>(95% CI)</b> | <b>2017 (8 beds)<br/>(95% CI)</b> | <b>2017 (9 beds)<br/>(95% CI)</b> | <b>2017 (10 beds)<br/>(95% CI)</b> |
|-------------------------------|-----------------------------------|-----------------------------------|-----------------------------------|-----------------------------------|------------------------------------|
| Average NMHA<br>ED LOS (h)    | 9.2<br>(8.4 - 9.8)                | 8.3<br>(7.6 - 8.9)                | 7.3<br>(6.8 - 7.8)                | 6.9<br>(6.5 - 7.3)                | 6.4<br>(6.1 - 6.8)                 |
| Average MHA<br>ED LOS (h)     | 7.7<br>(7.6 - 7.8)                | 7.7<br>(7.6 - 7.8)                | 7.6<br>(7.5 - 7.7)                | 7.6<br>(7.5 - 7.7)                | 7.7<br>(7.6 - 7.8)                 |
| Average overall<br>ED LOS (h) | 9.0<br>(8.3 - 9.7)                | 8.2<br>(7.7 - 8.8)                | 7.3<br>(6.9 - 7.8)                | 6.9<br>(6.5 - 7.3)                | 6.5<br>(6.1 - 6.8)                 |
| # patients seen<br>in PESU    | 2,338.9<br>(2,331.0 - 2,346.6)    | 2,707.7<br>(2,699.1 - 2,716.3)    | 3,062.7<br>(3,055.9 - 3,069.4)    | 3,408.5<br>(3,397.8 - 3,419.2)    | 3,746.1<br>(3,733.9 - 3,758.2)     |
| ER occupancy<br>(%)           | 93.3                              | 92.3                              | 91.2                              | 90.7                              | 90.0                               |
| PESU<br>Occupancy (%)         | 92.4                              | 91.4                              | 90.9                              | 89.7                              | 88.5                               |

## JOURNAL OF HEALTHCARE ENGINEERING

Table 10: Simulation results for Scenario E Part 2 - Combined change in demand and PESU bed capacity (2018)

| <b>Metric</b>                 | <b>2018 (6 beds)<br/>(95% CI)</b> | <b>2018 (7 beds)<br/>(95% CI)</b> | <b>2018 (8 beds)<br/>(95% CI)</b> | <b>2018 (9 beds)<br/>(95% CI)</b> | <b>2018 (10 beds)<br/>(95% CI)</b> |
|-------------------------------|-----------------------------------|-----------------------------------|-----------------------------------|-----------------------------------|------------------------------------|
| Average NMHA<br>ED LOS (h)    | 17.4<br>(14.9 - 19.9)             | 14.3<br>(12.5 - 16.0)             | 11.6<br>(10.5 - 12.7)             | 10.2<br>(9.4 - 11.0)              | 9.0<br>(8.3 - 9.6)                 |
| Average MHA<br>ED LOS (h)     | 7.7<br>(7.6 - 7.7)                | 7.7<br>(7.6 - 7.8)                | 7.6<br>(7.5 - 7.7)                | 7.7<br>(7.6 - 7.8)                | 7.7<br>(7.5 - 7.8)                 |
| Average overall<br>ED LOS (h) | 16.7<br>(14.4 - 19.1)             | 13.9<br>(12.2 - 15.5)             | 11.4<br>(10.4 - 12.5)             | 10.1<br>(9.3 - 10.8)              | 8.9<br>(8.3 - 9.5)                 |
| # patients seen<br>in PESU    | 2,365.6<br>(2,356.6 - 2,374.6)    | 2,742.8<br>(2,735.2 - 2,750.4)    | 3,104.4<br>(3,095.6 - 3,113.1)    | 3,463.5<br>(3,453.3 - 3,473.6)    | 3,805.6<br>(3,792.7 - 3,818.5)     |
| ER occupancy<br>(%)           | 95.2                              | 94.4                              | 98.1                              | 93.2                              | 93.1                               |
| PESU<br>Occupancy (%)         | 93.2                              | 92.5                              | 92.0                              | 90.6                              | 90.2                               |
